# Supplementary material for: Commercial Serological Tests for the Diagnosis of Active Pulmonary and Extrapulmonary Tuberculosis: An Updated Systematic Review and Meta-Analysis
Source: PLOS journal article supplement (doi:10.1371/journal.pmed.1001062), 2011-08-09
Supplement: S8 (10.1371/journal.pmed.1001062.s008) [file journal.pmed.1001062.s008]

Text S3. PubMed literature search, May 2006 to February 2010. A weekly search was run through June 2010

| **Search** | **Most Recent Queries** |
| --- | --- |
| [#17](http://www.ncbi.nlm.nih.gov/pubmed/?querykey=19&dbase=pubmed&querytype=eSearch&) | Search **#8 OR #16** |
| [#16](http://www.ncbi.nlm.nih.gov/pubmed/?querykey=18&dbase=pubmed&querytype=eSearch&) | Search **#15**  **AND "2006/05"[Entrez Date] : "3000"[Entrez Date]** |
| [#1](http://www.ncbi.nlm.nih.gov/pubmed/?querykey=16&dbase=pubmed&querytype=eSearch&)5 | Search **#10 AND #13 AND (in process[sb] OR publisher[sb] OR pubmednotmedline[sb])** |
| [#14](http://www.ncbi.nlm.nih.gov/pubmed/?querykey=14&dbase=pubmed&querytype=eSearch&) | Search **#10 AND #13** |
| [#13](http://www.ncbi.nlm.nih.gov/pubmed/?querykey=13&dbase=pubmed&querytype=eSearch&) | Search **#11 OR #12** |
| [#12](http://www.ncbi.nlm.nih.gov/pubmed/?querykey=12&dbase=pubmed&querytype=eSearch&) | Search **(diagnos*[ti] OR detect*[ti] OR screen*[ti]) AND (antibod*[tiab] OR antigen[tiab] OR serolog*[tiab] OR immunosorbent[tiab] OR lipopolysaccharide*[tiab] OR lipoarabinomannan[tiab] OR elisa[tiab] OR enzyme-linked[tiab] OR blot[tiab] OR blotting[tiab] OR humoral[tiab] OR immunochem*[tiab] OR blood[tiab] OR serum[tiab] OR urine[tiab] OR cerebrospinal fluid*[tiab] OR pleural[tiab])** |
| [#11](http://www.ncbi.nlm.nih.gov/pubmed/?querykey=11&dbase=pubmed&querytype=eSearch&) | Search **serodiagnos*[tiab] OR immunodiagnos*[tiab] OR humoral[ti] OR immunoassay[ti] OR immunoenzyme[ti]** |
| [#10](http://www.ncbi.nlm.nih.gov/pubmed/?querykey=10&dbase=pubmed&querytype=eSearch&) | Search **tuberculosis[ti]** |
| [#8](http://www.ncbi.nlm.nih.gov/pubmed/?querykey=8&dbase=pubmed&querytype=eSearch&) | Search #7 **AND "2006/05"[Entrez Date] : "3000"[Entrez Date]** |
| [#7](http://www.ncbi.nlm.nih.gov/pubmed/?querykey=7&dbase=pubmed&querytype=eSearch&) | Search **#1 AND #2 AND #5 NOT (animals[mh] NOT humans[mh])** |
| [#6](http://www.ncbi.nlm.nih.gov/pubmed/?querykey=6&dbase=pubmed&querytype=eSearch&) | Search **#1 AND #2 AND #5** |
| [#5](http://www.ncbi.nlm.nih.gov/pubmed/?querykey=5&dbase=pubmed&querytype=eSearch&) | Search **#3 OR #4** |
| [#4](http://www.ncbi.nlm.nih.gov/pubmed/?querykey=4&dbase=pubmed&querytype=eSearch&) | Search **antibodies, bacterial[mh] OR antibodies/blood OR antibodies/immunology OR antibody respon* OR "humoral immune" OR "humoral immunity" OR "humoral antibody" OR "immune based" OR "antibody detection" OR antigens, bacterial[mh] OR antigens/analysis OR antigens/blood OR antigens/cerebrospinal fluid OR antigens/immunology OR antigens/urine OR lipopolysaccharide* OR lipoarabinomannan OR "antigen detection" OR antigen[tiab] OR antigens[tiab]** |
| [#3](http://www.ncbi.nlm.nih.gov/pubmed/?querykey=3&dbase=pubmed&querytype=eSearch&) | Search **immunologic tests[mh] OR immunochemistry[mh] OR serology[ti] OR serological[ti] OR serodiagnosis[tiab] OR serodiagnostic[tiab] OR immunodiagnosis[tiab] OR immunodiagnostic[tiab] OR antibody[tiab] OR antibodies[tiab] OR elisa[tiab] OR immunosorbent[tiab] OR (western[tiab] AND blot*[tiab]) OR immunoassay[tiab]** |
| [#2](http://www.ncbi.nlm.nih.gov/pubmed/?querykey=2&dbase=pubmed&querytype=eSearch&) | Search **"sensitivity and specificity"[mh] OR sensitiv*[tiab] OR diagnosis[mh:noexp] OR diagnosis, differential[mh:noexp] OR diagnosis[sh] OR diagnos*[tiab] OR diagnostic*[tiab] OR predictive value of tests[mh] OR reproducibility of results[mh]** |
| [#1](http://www.ncbi.nlm.nih.gov/pubmed/?querykey=1&dbase=pubmed&querytype=eSearch&) | Search **tuberculosis[mh] OR mycobacterium tuberculosis[mh]** |
